# Supplementary material for: Preparation and catalytic ability to reduce hydrogen peroxide of Ag nanoparticles highly dispersed via hyperbranched copolymer
Source: Royal Society of Chemistry journal article supplement (doi:10.1039/c0nr00567c), 2010-12-04

Supplementary Material (ESI) for Nanoscale

# **Preparation and catalytic ability to hydrogen peroxide of Ag nanoparticles highly dispersed via hyperbranched copolymer**

**Lu Yao,<sup>a</sup> Weiying Yang,<sup>b</sup> Jie Yang,<sup>b</sup> Linghao He,<sup>a</sup> Jing Sun,<sup>a</sup>**

**Rui Song,<sup>\*a</sup> Zhi Ma<sup>c</sup> and Wei Huang<sup>d</sup>**

<sup>a</sup> Key Lab of Surface and Interface Sciences of Henan Provincial, Zhengzhou University of Light Industry, Zhengzhou, 450005, China, Tel: 86-10-88253067; Fax: 86-10-88256092; E-mail: rsong@gucas.ac.cn

<sup>b</sup> College of Chemistry and Chemical Engineering, Graduate University of Chinese Academy of Sciences, Beijing, 100049, China

<sup>c</sup> Shanghai Institute of Organic Chemistry, Chinese Academy of Sciences, Shanghai, 200032, China

<sup>d</sup> Laboratory of Advanced Polymer Materials, Institute of Chemistry, Chinese Academy of Sciences, Beijing, 100080, China

**Table S1.** Structure parameters of the HPCs.

| Sample | St (mol %) <sup>a</sup> | CMS(mol %) <sup>b</sup> | $M_n$ (KDa) <sup>c</sup> | $M_w$ (KDa) <sup>c</sup> | $M_w/M_n$ <sup>c</sup> | 2°-BCl/1°-BCl <sup>d</sup> |
|--------|-------------------------|-------------------------|--------------------------|--------------------------|------------------------|----------------------------|
| HPC-1  | 30                      | 70                      | 7.4                      | 35.1                     | 4.74                   | 0.28                       |
| HPC-2  | 70                      | 30                      | 6.9                      | 21.8                     | 3.13                   | 0.13                       |

<sup>a</sup> content of styrene in total monomers; <sup>b</sup> content of p-chloromethyl styrene in total monomers;  
<sup>c</sup> determined by GPC; <sup>d</sup> determined by <sup>1</sup>H NMR.

**Fig S1.** the structure of HPCs

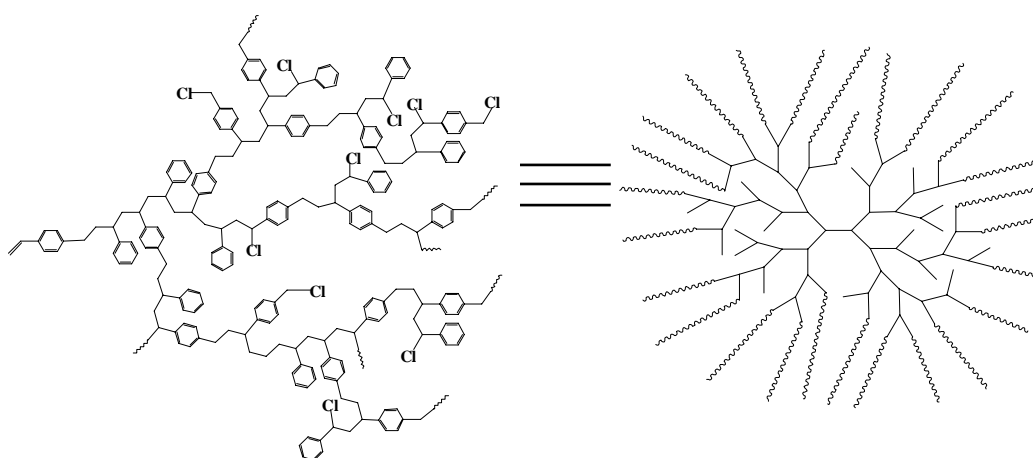

**Fig. S2.** UV-vis spectra of (a) Ag NPs, (b) HPC-1/Ag NPs, (c) HPC-2/Ag NPs dispersed in toluene after half a year.

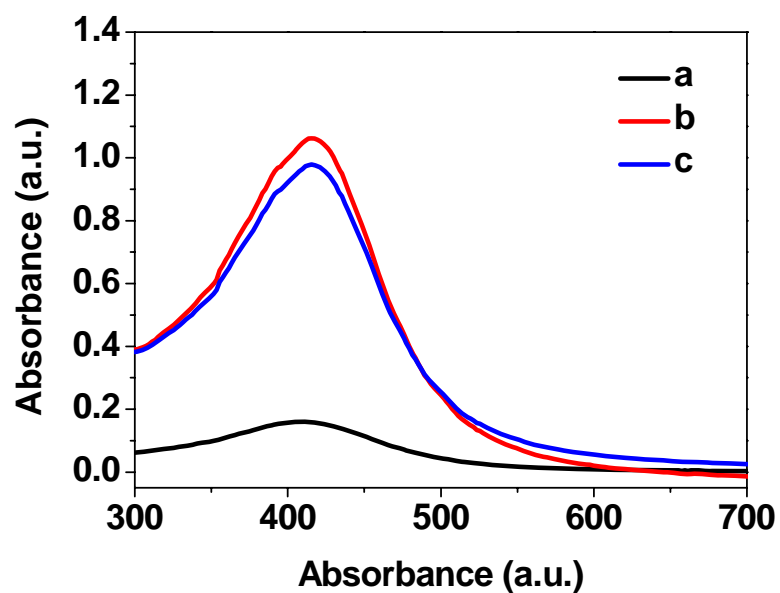

**Fig S3.** XPS spectrum for (a) Ag NPs, (b) HPC-1/Ag NPs, (c) HPC-2/Ag NPs. The insets in the expanded spectra are detailed scan spectra of Ag<sub>3d</sub>.

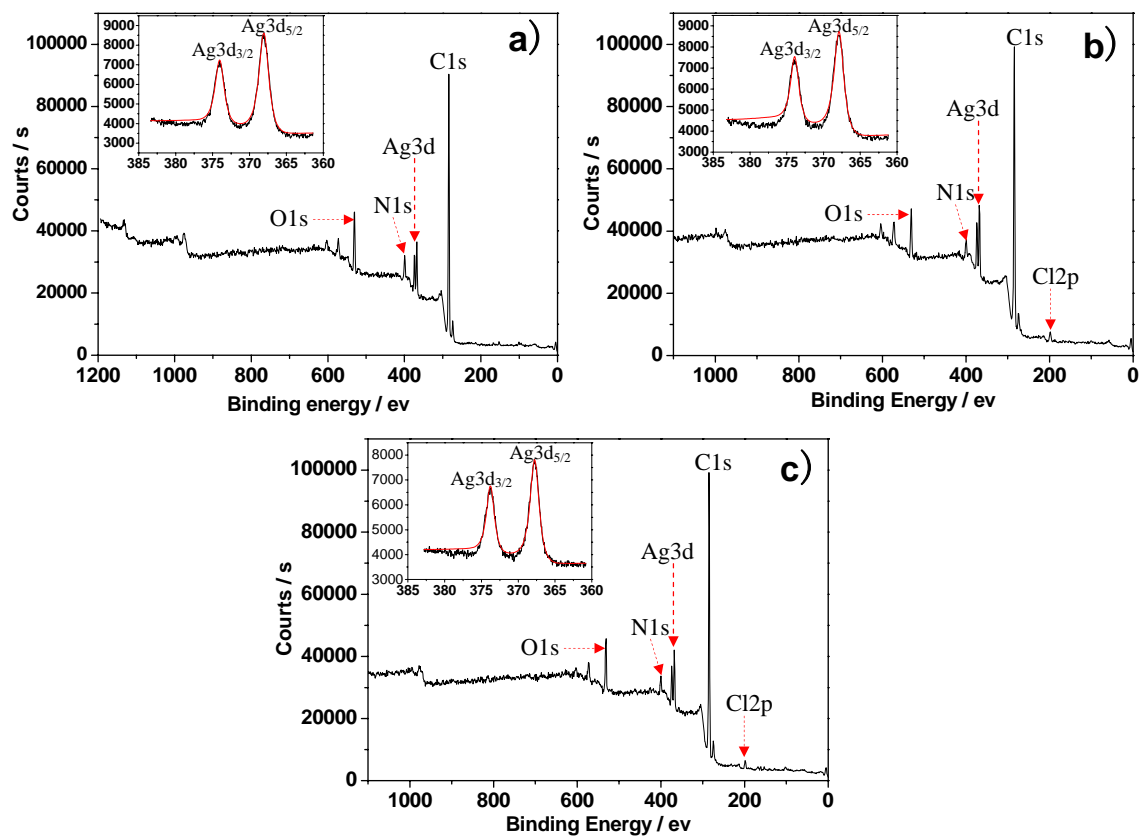

Supplement: c0nr00567c.pdf [file c0nr00567c.pdf]
